# Supplementary material for: Crescent-Like Lesions as an Early Signature of Nephropathy in a Rat Model of Prediabetes Induced by a Hypercaloric Diet
Source: MDPI journal article supplement (doi:10.3390/nu12040881), 2020-03-25
Supplement: s1 [file s1]

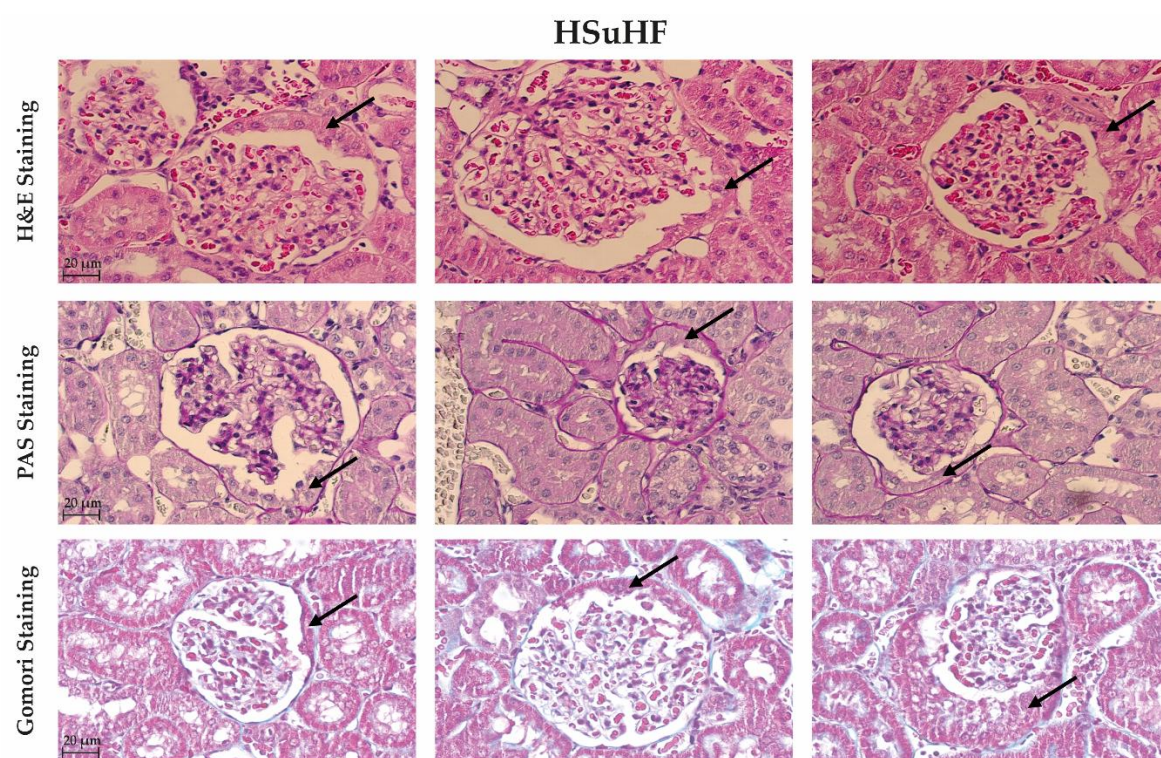

**Supplementary Figure 1.** Images of glomerular crescent-like structures (depicted with arrows) evaluated by H&E, PAS and Gomori staining in the HSuHF-treated rats.
